# Supplementary material for: Nucleolytic processing of abasic sites underlies PARP inhibitor hypersensitivity in ALC1-deficient BRCA mutant cancer cells
Source: PubMed Central journal article supplement — Nat Commun. 2024 Jul 27;15:6343. doi: 10.1038/s41467-024-50673-7 (PMC11283519; doi:10.1038/s41467-024-50673-7), 2024-07-27
Supplement: 41467_2024_50673_MOESM1_ESM.pdf [file 41467_2024_50673_MOESM1_ESM.pdf]

(a)

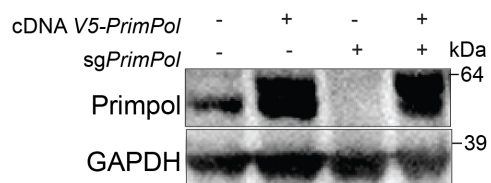

(b)

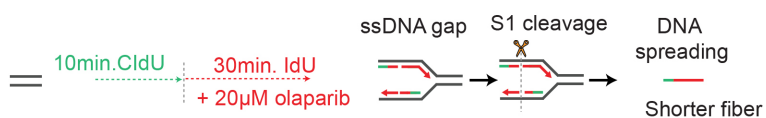

(c)

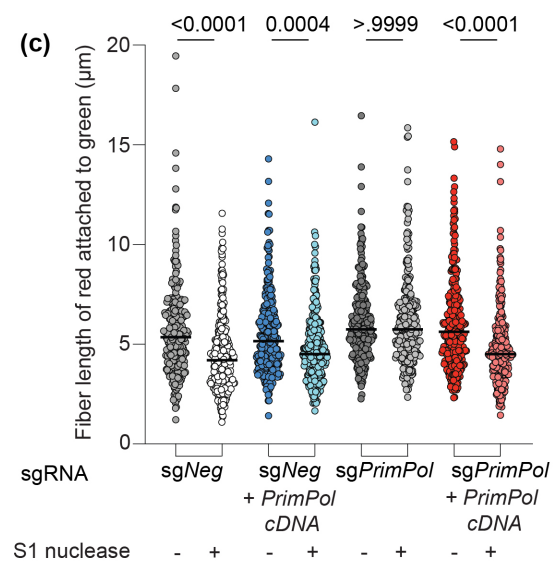

**Supplementary Figure 1. Complementation of *PrimPol* knockout cells with *PrimPol* cDNA rescues gap formation.**

**(a)** Immunoblot showing depletion of PrimPol and complementation with V5-tagged *PrimPol* cDNA. Representative of two blots.

**(b)** Schematic of S1-nuclease fiber assay. CldU: 5-chloro-2'-deoxyuridine; IdU: 5-iodo-2'-deoxyuridine.

**(c)** Fiber length analysis of the indicated cell lines treated with olaparib. Median values are indicated. *P* values derived by Kruskal-Wallis test from >250 fibers collected over n=2 biologically independent experiments.

SUM149PT (*BRCA1* mutant)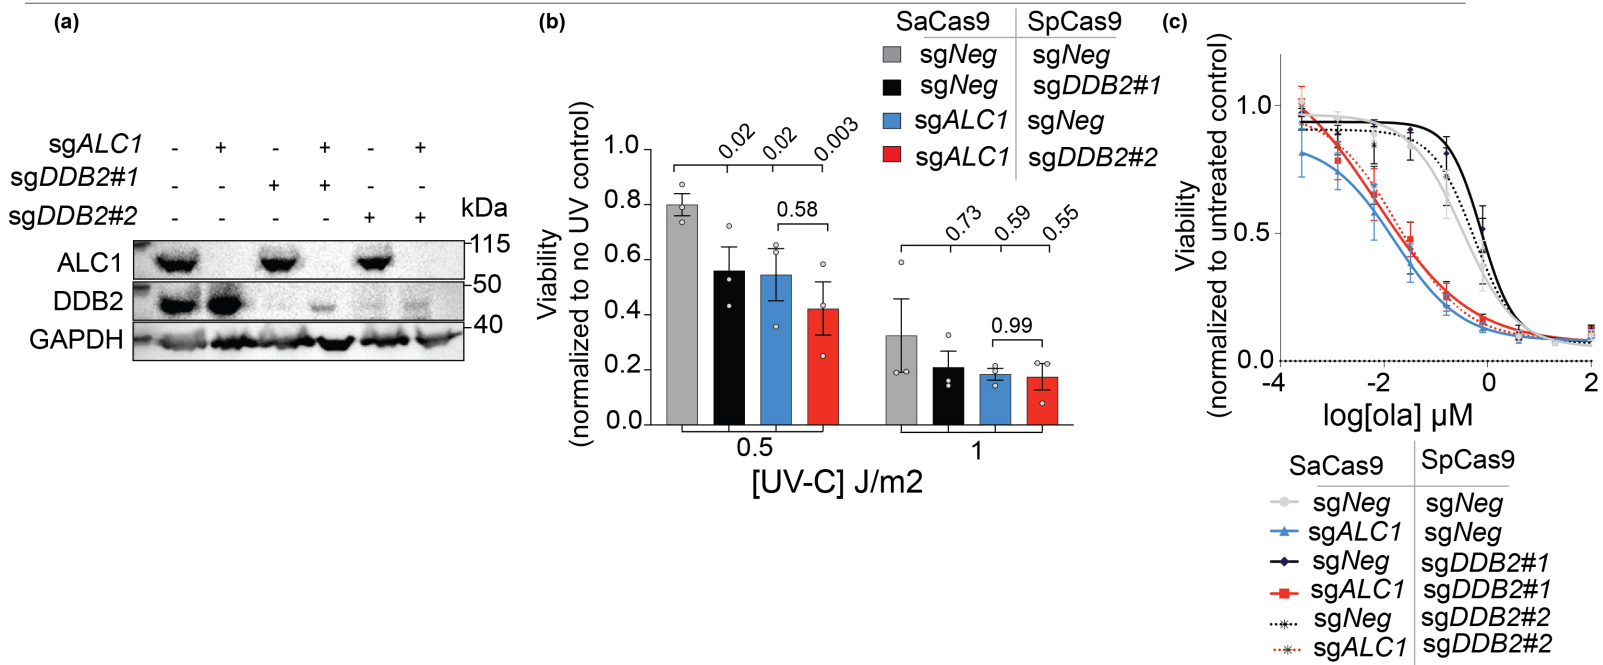UWB1.289 (*BRCA1* mutant)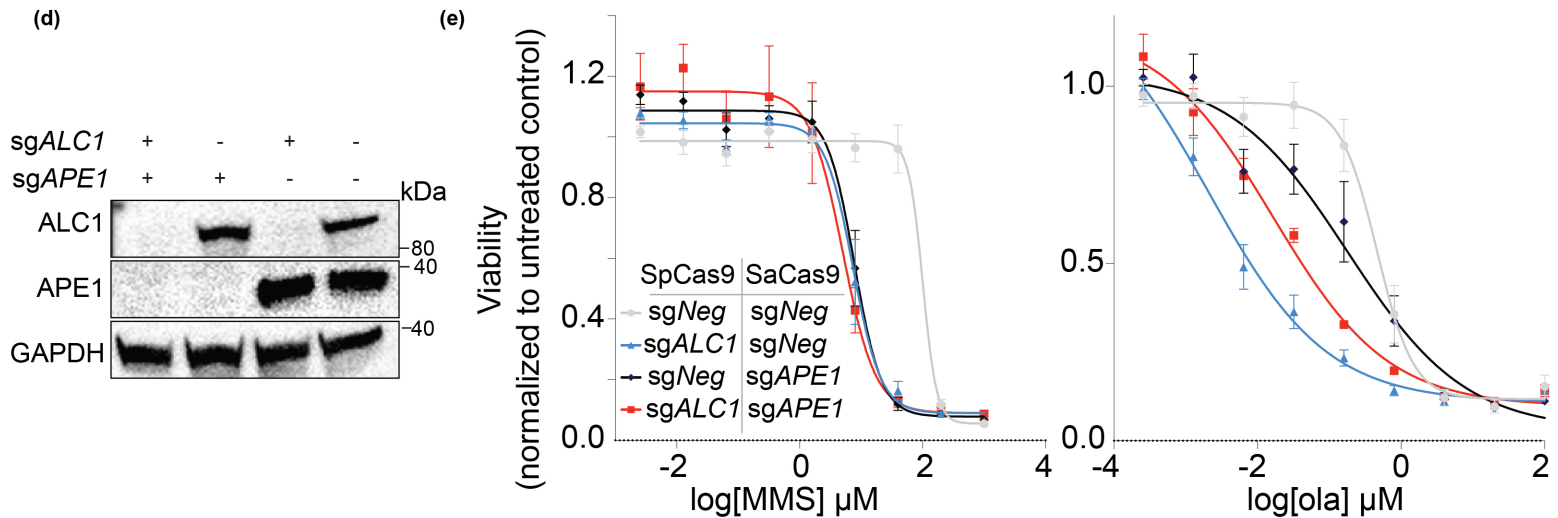SUM149PT (*BRCA1* mutant)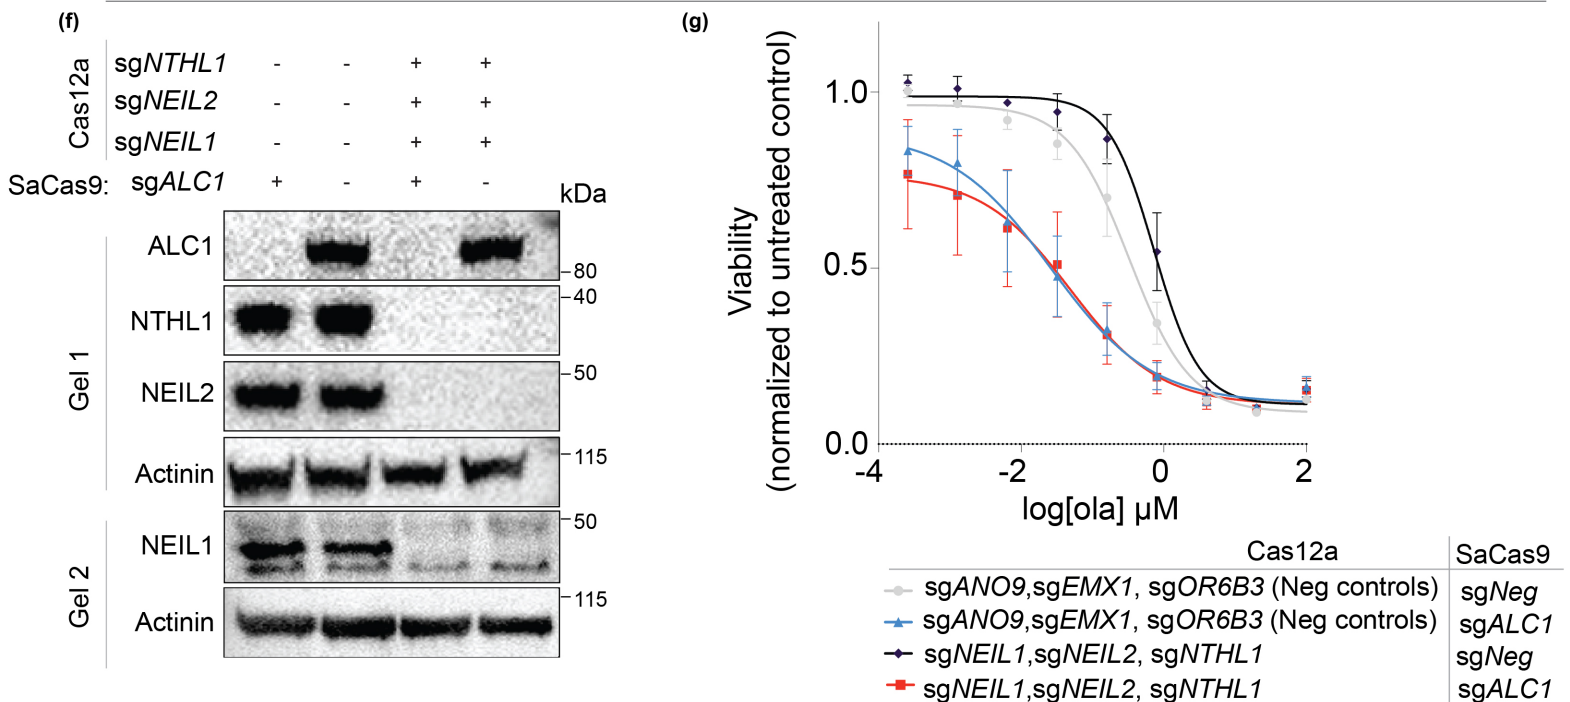

**Supplementary Figure 2. Epistasis between ALC1 and BER/NER factors in response to UV-C and olaparib in *BRCA1* mutant cells.**

**(a)** Immunoblot showing depletion of ALC1 and DDB2. Representative of three blots

**(b)** Sensitivities of the indicated SUM149PT cell lines to UV-C. Data are presented as mean  $\pm$  s.e.m from n=3 biologically independent experiments. *P* values derived by Ordinary one-way ANOVA.

**(c)** Sensitivities of the indicated cell lines to olaparib. Data are presented as mean  $\pm$  s.e.m from n=3 biologically independent experiments.

**(d)** Immunoblot showing depletion of ALC1 and APE1 in UWB1.289. Representative of three blots

**(e)** Sensitivities of the indicated UWB1.289 cell lines to MMS (left) and olaparib (right). Data are presented as mean  $\pm$  s.e.m from n=3 biologically independent experiments.

**(f)** Immunoblot showing depletion of NTHL1, NEIL2, NEIL1, ALC1 in SUM149PT cells. Representative of three blots.

**(g)** Sensitivities of the indicated SUM149PT cell lines to olaparib. Data are presented as mean  $\pm$  s.e.m from n=3 biologically independent experiments.

SUM149PT (*BRCA1* mutant)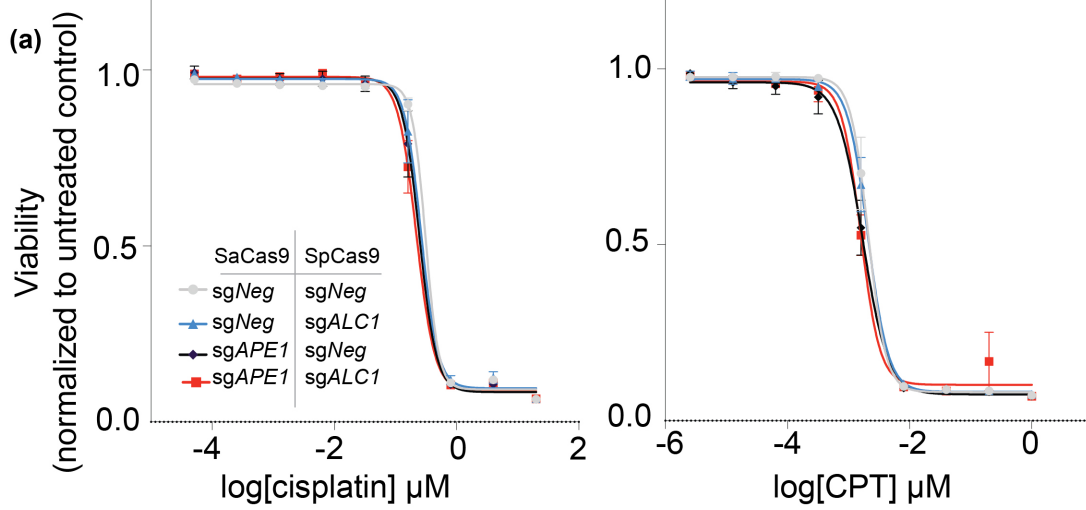DLD1 (*BRCA1/2* WT)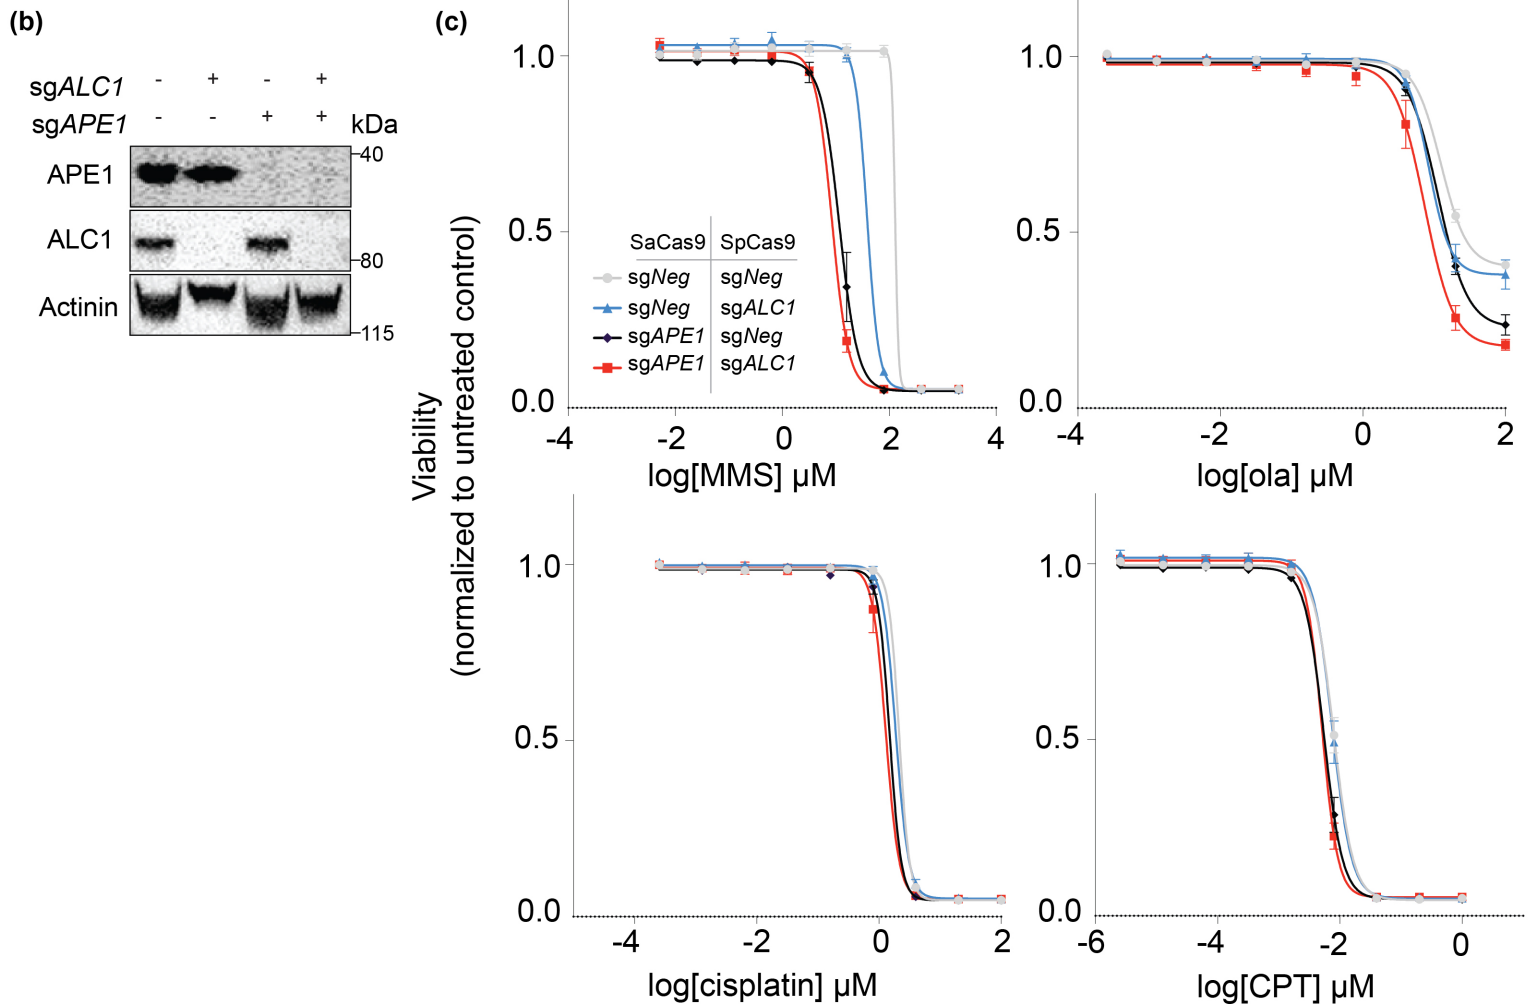

**Supplementary Figure 3. Epistasis between ALC1 and APE1 in response to various DNA damaging agents.**

**(a)** Sensitivities of the indicated SUM149PT cell lines to cisplatin (left) and camptothecin (CPT, right). Data are presented as mean  $\pm$  s.e.m from n=3 biologically independent experiments.

**(b)** Immunoblot showing depletion of ALC1 and APE1 in DLD1 *BRCA1/2* WT cells. Representative of three blots.

**(c)** Sensitivities of the indicated DLD1 cell lines to MMS, olaparib, cisplatin and camptothecin (CPT). Data are presented as mean  $\pm$  s.e.m from n=3 biologically independent experiments.

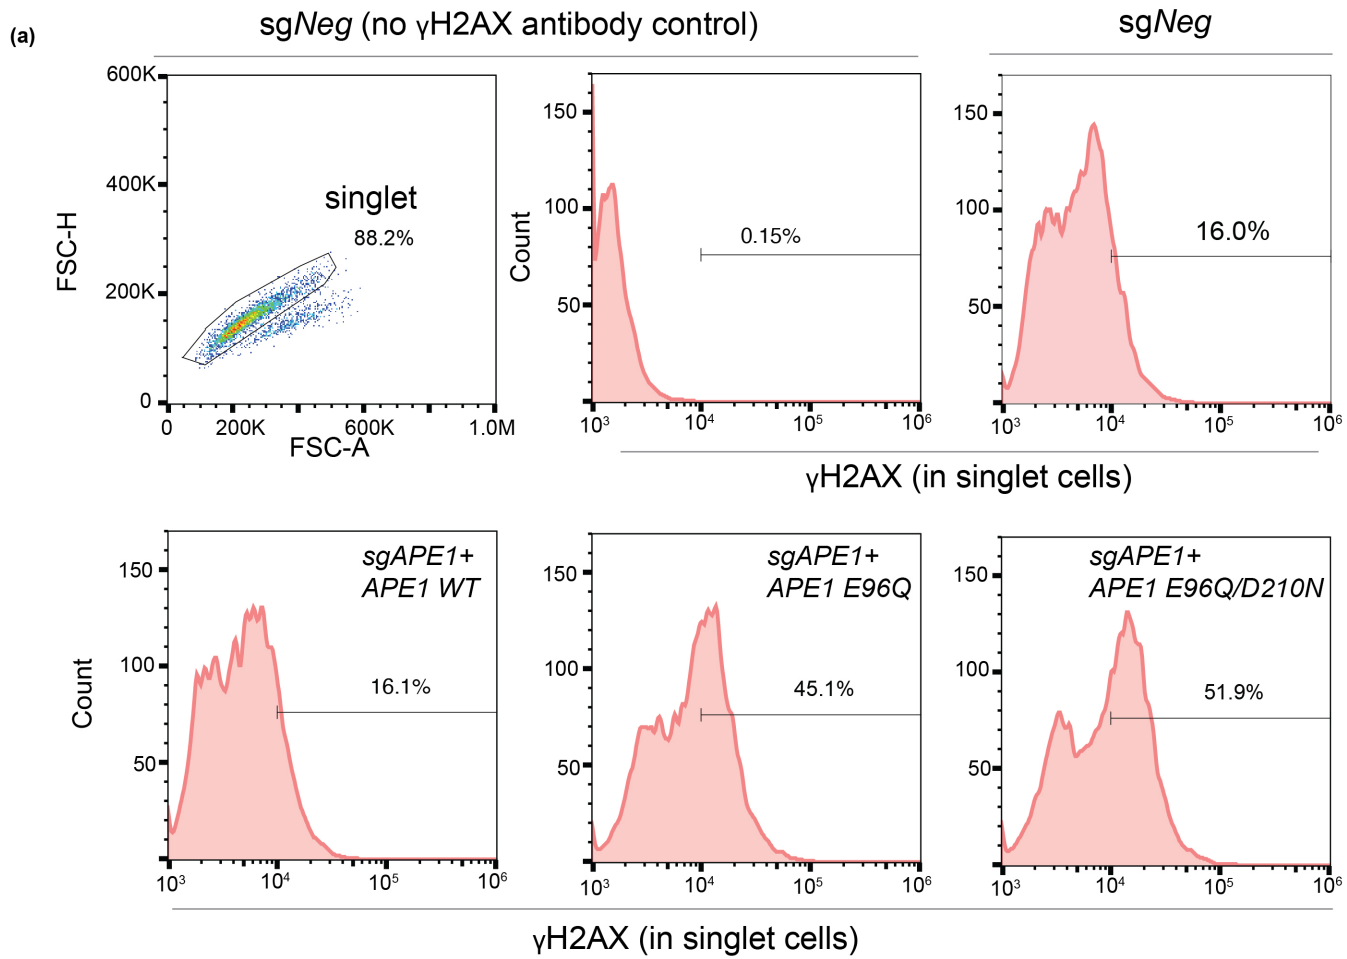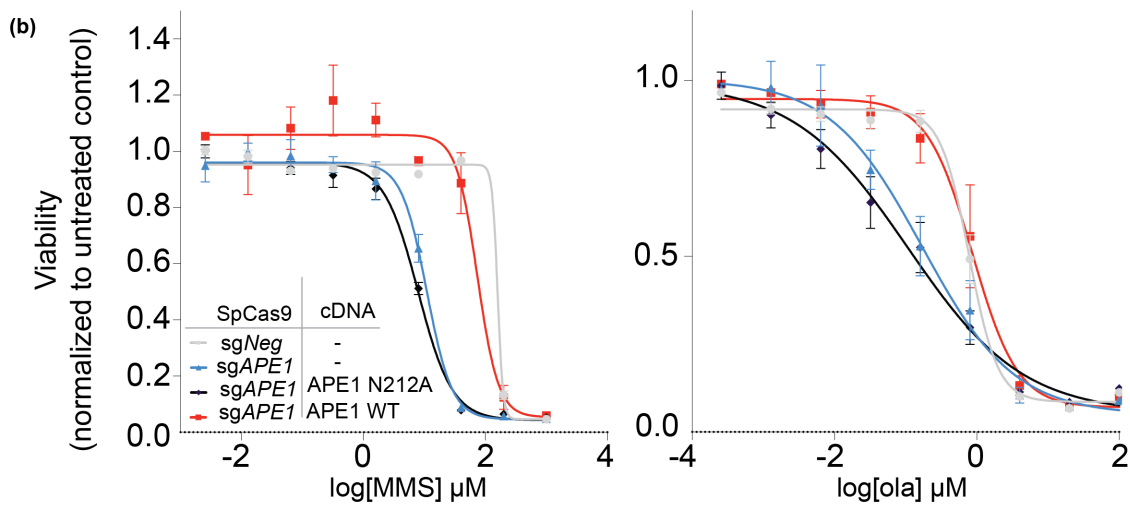

**Supplementary Figure 4. Impact of various APE1-mutants on genome stability and genotoxin response in *BRCA1* mutant SUM149PT cells.**

**(a)** Representative flow images showing  $\gamma$ H2AX signal in singlet cells after expression of various APE1 mutants.

**(b)** Sensitivities of the indicated SUM149PT cell lines to MMS (left) and olaparib (right). Data are presented as mean  $\pm$  s.e.m from n=3 biologically independent experiments.



**Supplementary Table 1: List of sgRNAs and oligos used in the study**

| Name of the oligo                                         | Sequence (5'-3')                                                                                                                                                                                                           |
|-----------------------------------------------------------|----------------------------------------------------------------------------------------------------------------------------------------------------------------------------------------------------------------------------|
| sgRNA for APE1 _SaCas9                                    | ATATGCTGTTACCAGCACAA                                                                                                                                                                                                       |
| sgRNA#1 for DDB2_SpCas9                                   | TGGTCACAGGAGACAACGTG                                                                                                                                                                                                       |
| sgRNA#2 for DDB2_SpCas9                                   | AAAACCTGGTTGGTATTGAGA                                                                                                                                                                                                      |
| sgRNA for PNKP _SpCas9                                    | CCTGGGTCCC GG TAGTTGAG                                                                                                                                                                                                     |
| sgRNA for PrimPol _SpCas9                                 | CTGCCAAGCAAGTCAAGAGC                                                                                                                                                                                                       |
| sgRNA#1 for XPC_SpCas9                                    | GCATAGCTGGTATAGACCAG                                                                                                                                                                                                       |
| sgRNA#2 for XPC_SpCas9                                    | GCTGTAGAGACAATACCAGC                                                                                                                                                                                                       |
| sgRNA for ALC1_SaCas9                                     | TCCACAACAAGAACA CTCCA                                                                                                                                                                                                      |
| sgRNA for ALC1_SpCas9                                     | GTCGCCTGCATATGTTACAC                                                                                                                                                                                                       |
| sgRNA for AAVS1_SpCas9<br>(Negative Control)              | GCCAGTAGCCAGCCCCGTCC                                                                                                                                                                                                       |
| sgRNA for HPRT_SaCas9<br>(Negative Control)               | GTCCCAACAGCAATTCCTAA                                                                                                                                                                                                       |
| Cas12a guides for ANO9; EMX1;<br>OR6B3 (Negative control) | AGATGCCTGTACCGCACTCTCCTCTAATTTCTACT,<br>GTCGTAGATCCTCCGACTGCGGGCTCCCTTAATTTCT,<br>ACTATCGTAGATATTCTGGCCTTCATCATCCT                                                                                                         |
| Cas12a guide for NEIL1; NEIL2;<br>NTHL1                   | AGATGAGCCTGGCTGCGCTGCTATTAATTTCTACT,<br>GTCGTAGATGTCTCCCCCTTTGTGGGTCATAATTTCT,<br>ACTATCGTAGATAGAGCAAGGTGAAATACATC                                                                                                         |
| AP-NCPdyad oligo 1                                        | GGTAATTGTAATCGGATGTATATATCTGACACGTGCCTGGAGACT<br>AGGGAGTAATCCCCTTGGCGGTTAAAACGCGGGGGACAGCGCGT<br>ACGTGCGTTTAAGCGGTGCTAGAGCTGTCTACGACCAATTGAGCG<br>GCCTCGGCACCGGGATTCTCGATTTCGAACTGGGTTGCTGAGTTCT<br>CAACGTGGCTCATGTGTC     |
| AP-NCPdyad oligo 2                                        | GACACATGAGCCACGTTGAGAACTCAGCAACCCAGTTCGAATCGA<br>GAATCCCGGTGCCGAGGCCGCTCAATTGGTTCGTAGACAGCTCTAG<br>CACCGCTTAAACGCACG                                                                                                       |
| AP-NCPdyad oligo 3                                        | /5Phos/TACGC/idSp/CTGTCCCCCGCGTTTTAACCGCCAAGGGGATT<br>ACTCCCTAGTCTCCAGGCACGTGTCAGATATATACATCCGAT<br>TACAATTACC /3Cy5Sp/                                                                                                    |
| Nucleofection guide for APE1                              | mG*mU*mC*rUrGrGrUrArCrGrArCrUrGrGrArGrUrArCrGrUrUrUrUrAr<br>GrArGrCrUrArGrArArArUrArGrCrArArGrUrUrArArArArUrArArGrGrCr<br>UrArGrUrCrCrGrUrUrArUrCrArArCrUrUrGrArArArArArGrUrGrGrCrArC<br>rCrGrArGrUrCrGrGrUrGrCmU*mU*mU*rU |
| Nucleofection guide for ALC1                              | mG*mU*mC*rGrCrCrUrGrCrArUrArUrGrUrUrArCrArCrGrUrUrUrUrArG<br>rArGrCrUrArGrArArArUrArGrCrArArGrUrUrArArArArUrArArGrGrCrUr<br>ArGrUrCrCrGrUrUrArUrCrArArCrUrUrGrArArArArArGrUrGrGrCrArCrC<br>rGrArGrUrCrGrGrUrGrCmU*mU*mU*rU |

**Supplementary Table 2: List of cDNA generated in the study**

| <b>Name of the construct</b>                                            | <b>Details of the vector backbone</b>                                                                                                                                    |
|-------------------------------------------------------------------------|--------------------------------------------------------------------------------------------------------------------------------------------------------------------------|
| V5-tagged PrimPol cDNA resistant to sg <i>PrimPol</i> in pCDH-CMV-Blast | pCDH-CMV was a gift from Kazuhiro Oka (Addgene plasmid # 72265; <a href="http://n2t.net/addgene:72265">http://n2t.net/addgene:72265</a> ; RRID:Addgene_72265)            |
| HA-tagged APE1 WT cDNA resistant to sgAPE1 in LentiV_Neo                | LentiV_Neo was a gift from Christopher Vakoc (Addgene plasmid # 108101; <a href="http://n2t.net/addgene:108101">http://n2t.net/addgene:108101</a> ; RRID:Addgene_108101) |
| HA-tagged APE1 N21A cDNA resistant to sgAPE1 in LentiV_Neo              | LentiV_Neo was a gift from Christopher Vakoc (Addgene plasmid # 108101; <a href="http://n2t.net/addgene:108101">http://n2t.net/addgene:108101</a> ; RRID:Addgene_108101) |
| HA-tagged APE1 E96Q/D210N cDNA resistant to sgAPE1 in LentiV_Neo        | LentiV_Neo was a gift from Christopher Vakoc (Addgene plasmid # 108101; <a href="http://n2t.net/addgene:108101">http://n2t.net/addgene:108101</a> ; RRID:Addgene_108101) |
| HA-tagged APE1 E96Q/D210N cDNA resistant to sgAPE1 in pInducer20        | pInducer20 was a gift from Stephen Elledge (Addgene plasmid # 44012; <a href="http://n2t.net/addgene:44012">http://n2t.net/addgene:44012</a> ; RRID:Addgene_44012)       |

**Supplementary Table 3: Details of antibodies used in the study**

| <b>Antibody</b> | <b>Company</b>                    | <b>Catalogue Number</b> | <b>Lot Number</b> | <b>Dilution for western</b> | <b>Dilution for IF</b> | <b>Dilution for FACS</b> |
|-----------------|-----------------------------------|-------------------------|-------------------|-----------------------------|------------------------|--------------------------|
| $\gamma$ H2AX   | Sigma                             | 05-636-I                | 3748823           |                             | 1 : 2000               | 1 : 200                  |
| PrimPol         | Gift from Alessandro Vindigni lab | N/A                     | N/A               | 1 : 1000                    |                        |                          |
| ALC1            | Cell Signaling Technology         | 13460S                  | 1                 | 1 : 1000                    |                        |                          |
| ALC1            | Santa Cruz Biotechnology          | sc-81065 Sample         | H1721             | 1 : 100                     |                        |                          |
| GAPDH           | Cell Signaling                    | 2118S and 97166T        | 1                 | 1 : 2000                    |                        |                          |
| PNKP            | Abcam                             | ab170954                | YJ122604DS        | 1 : 1000                    |                        |                          |
| APE1            | Thermo Fisher                     | MA5-31586               | WI3388209         | 1 : 1000                    |                        |                          |
| Actinin         | Cell Signaling Technology         | D6F6                    | 4                 | 1 : 2000                    |                        |                          |
| IdU             | Becton Dickinson and Company      | 347580                  | 1210802           |                             | 1 : 200                |                          |
| CldU            | Abcam                             | 6326                    | 1009715-13        |                             | 1 : 200                |                          |
| HA              | Biolegend                         | 901514                  | B272772           |                             | 1 : 1000               |                          |
| XPC             | Cell Signaling Technology         | 12701T                  | 1                 | 1 : 1000                    |                        |                          |
| DDB2            | Abcam                             | ab181136                | GR3315250-6       | 1 : 1000                    |                        |                          |
| Biotin          | Cell Signaling                    | 5597S                   | 1                 |                             | 1 : 200                |                          |
| NTHL1           | Santa Cruz Biotechnology          | sc-130644               | 92822             | 1:200                       |                        |                          |
| NEIL1           | Life Technologies                 | 12145-1-AP              | 2807              | 1:500                       |                        |                          |
| NEIL2           | Gentex                            | GTX132565               | 42970             | 1:500                       |                        |                          |
| PARP1           | Abcam                             | ab227244                | 1035485-20        |                             | 1:500                  |                          |
| Rad51           | Cosmo Bio                         | BAM-70-001-EX           | 4                 |                             | 1:500                  |                          |
